# Supplementary material
Source: Springer Nature journal article supplement (https://www.springermedizin.de/resource/supplementary/12936_2012_2582_MOESM3_ESM.pdf/9543294)
Supplement: MOESM3 [file 9543294]

Additional file 3: Representative Pre and Post-Purification Sporozoite Numbers Tested with Different Accudenz Concentrations

*Plasmodium falciparum* sporozoites

| % w/v Accudenz Concentration | # Sporozoites Pre-Purification | # Sporozoites Post-Purification | % Recovery |
|------------------------------|--------------------------------|---------------------------------|------------|
| 5                            | 5.00E+05                       | 7.40E+04                        | 14.8       |
| 10                           | 5.00E+05                       | 2.18E+05                        | 43.5       |
| 17                           | 5.00E+05                       | 4.17E+05                        | 83.4       |
| 25                           | 5.00E+05                       | 4.43E+05                        | 88.5       |
